# Supplementary material for: Synthesis of a biotinylated heptose 1,7-bisphosphate analogue, a probe to study immunity and inflammation
Source: Royal Society of Chemistry journal article supplement (doi:10.1039/d1ob00790d), 2021-01-01

## ***Supporting Information***

### **Synthesis of a Biotinylated Heptose 1,7-Bisphosphate Analogue**

Lina LIANG,<sup>a</sup> Jun CAO,<sup>b</sup> Tong-You Wade WEI,<sup>c</sup> Ming-Daw TSAI,<sup>c</sup> and Stéphane P. VINCENT\*<sup>b</sup>

<sup>a</sup> *Bengbu Medical College, Bengbu, Anhui, China*

<sup>b</sup> *University of Namur (UNamur), NARILIS, Department of Chemistry, rue de Bruxelles 61, 5000 Namur, Belgium E-mail: stephane.vincent@unamur.be*

<sup>c</sup> *Institute of Biological Chemistry, Academia Sinica, Taipei, Taiwan*

### <sup>1</sup>H NMR (500 MHz, CDCl<sub>3</sub>)

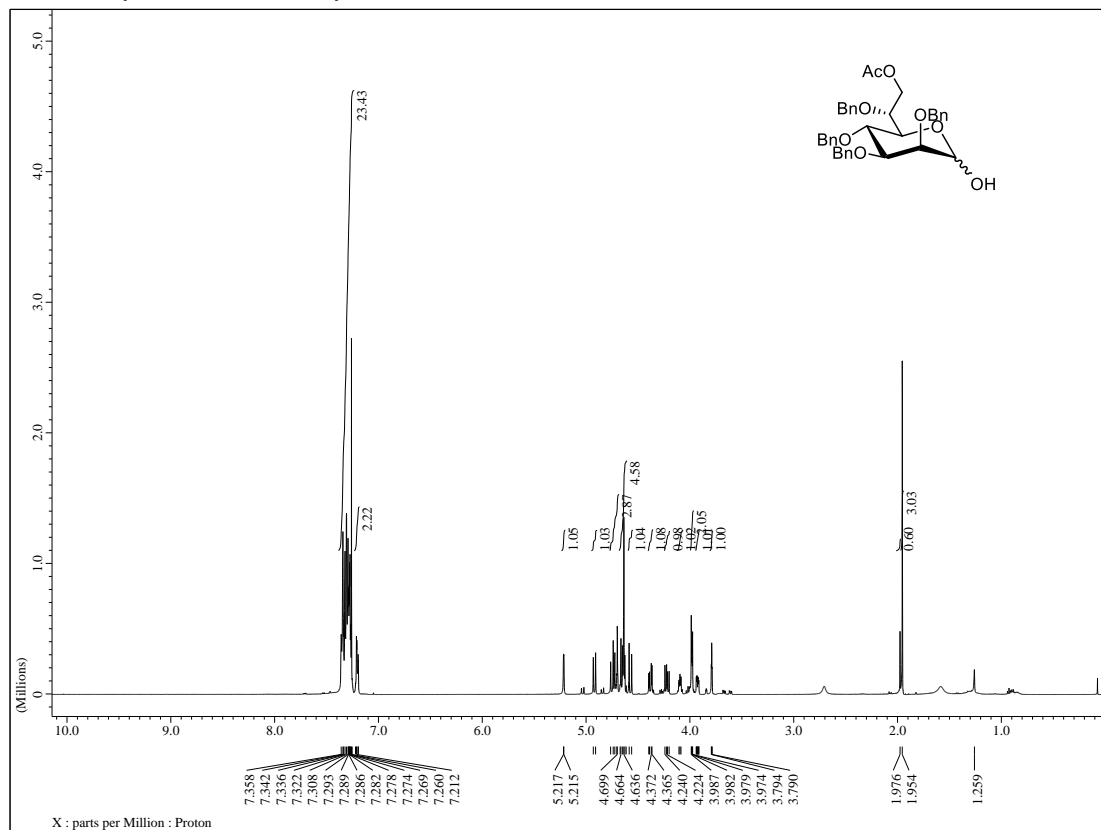

### <sup>13</sup>C NMR (125 MHz, CDCl<sub>3</sub>)

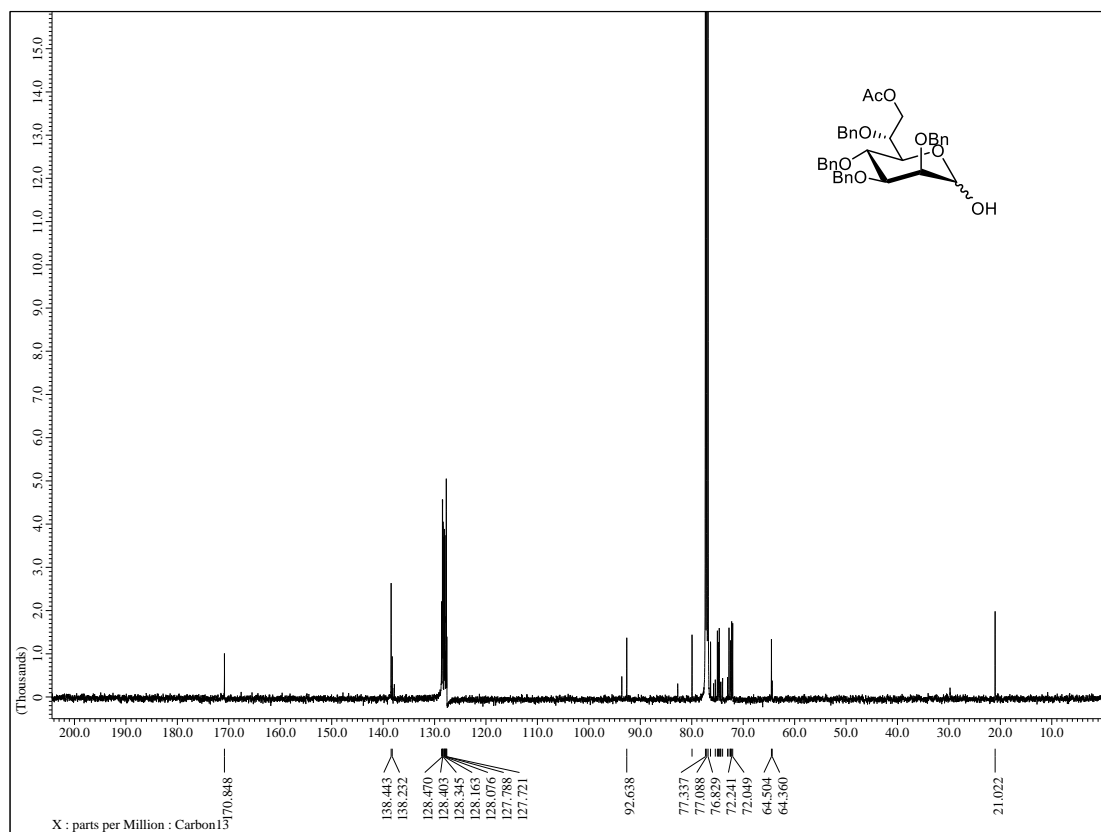

### <sup>1</sup>H NMR (400 MHz, CDCl<sub>3</sub>)

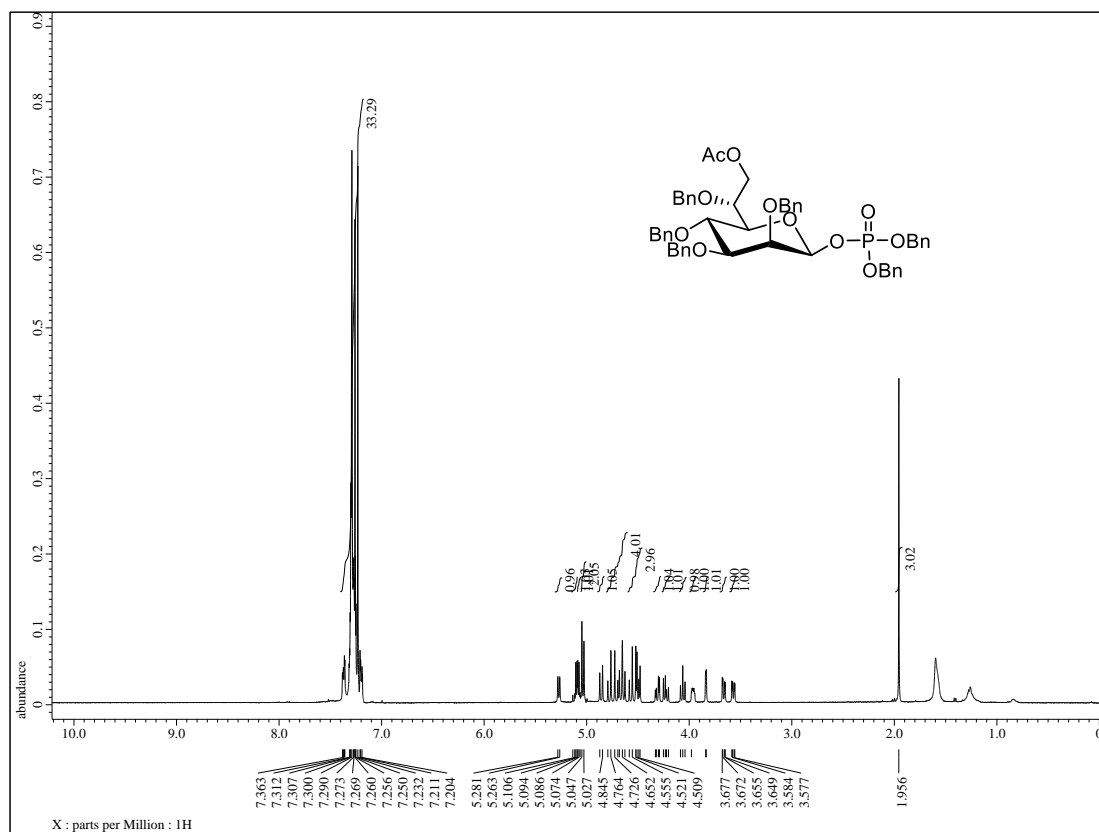

### <sup>13</sup>C NMR (100 MHz, CDCl<sub>3</sub>)

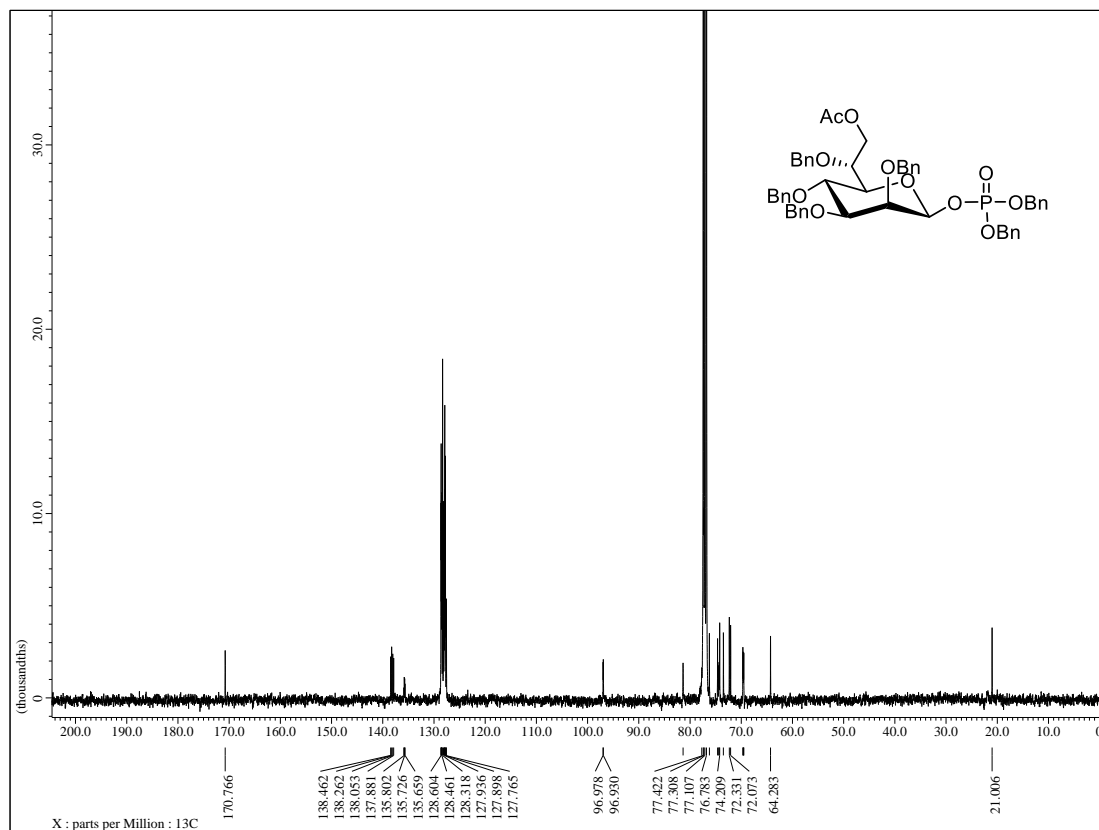

### <sup>31</sup>P NMR (162 MHz, CDCl<sub>3</sub>)

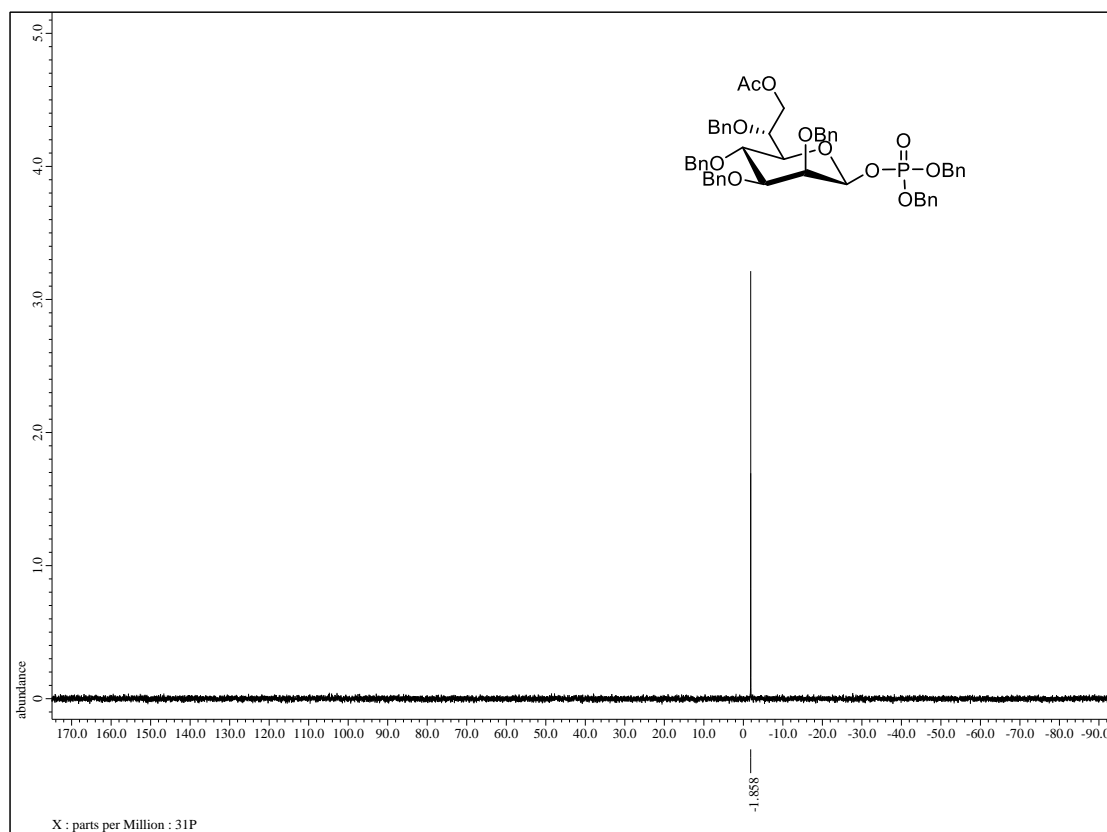

### <sup>1</sup>H NMR (400 MHz, CDCl<sub>3</sub>)

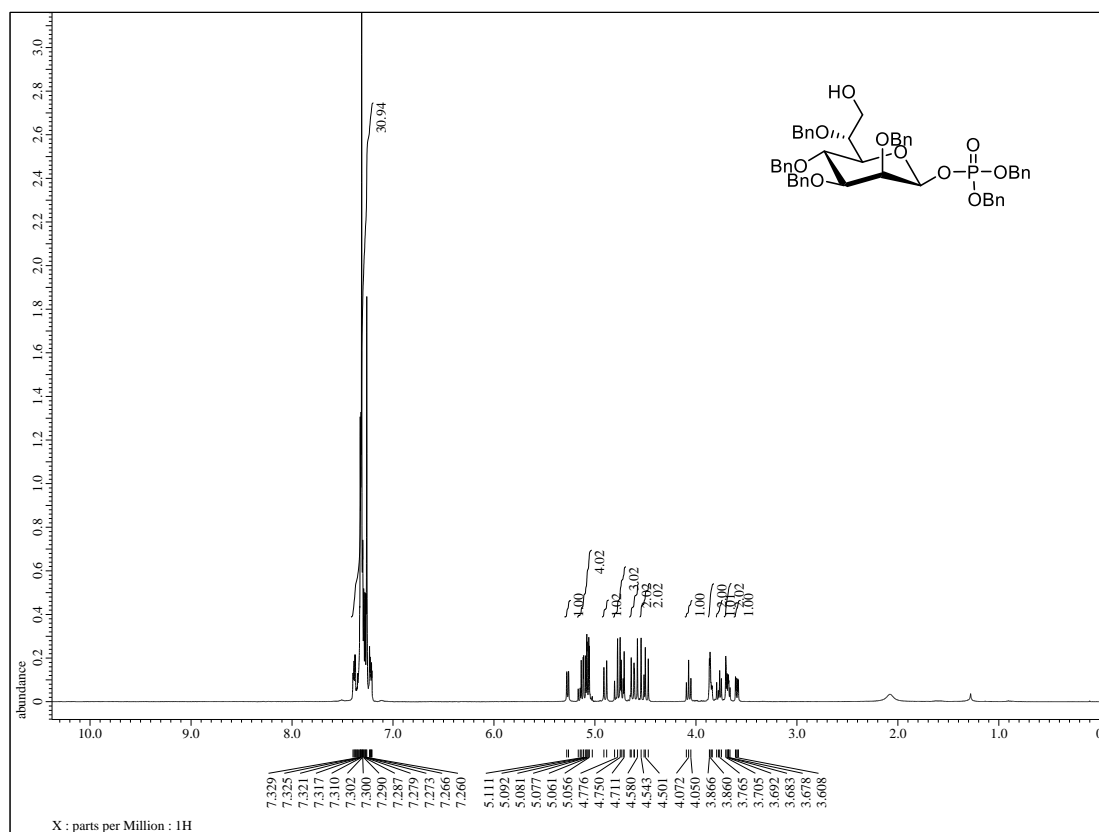

### <sup>13</sup>C NMR (100 MHz, CDCl<sub>3</sub>)

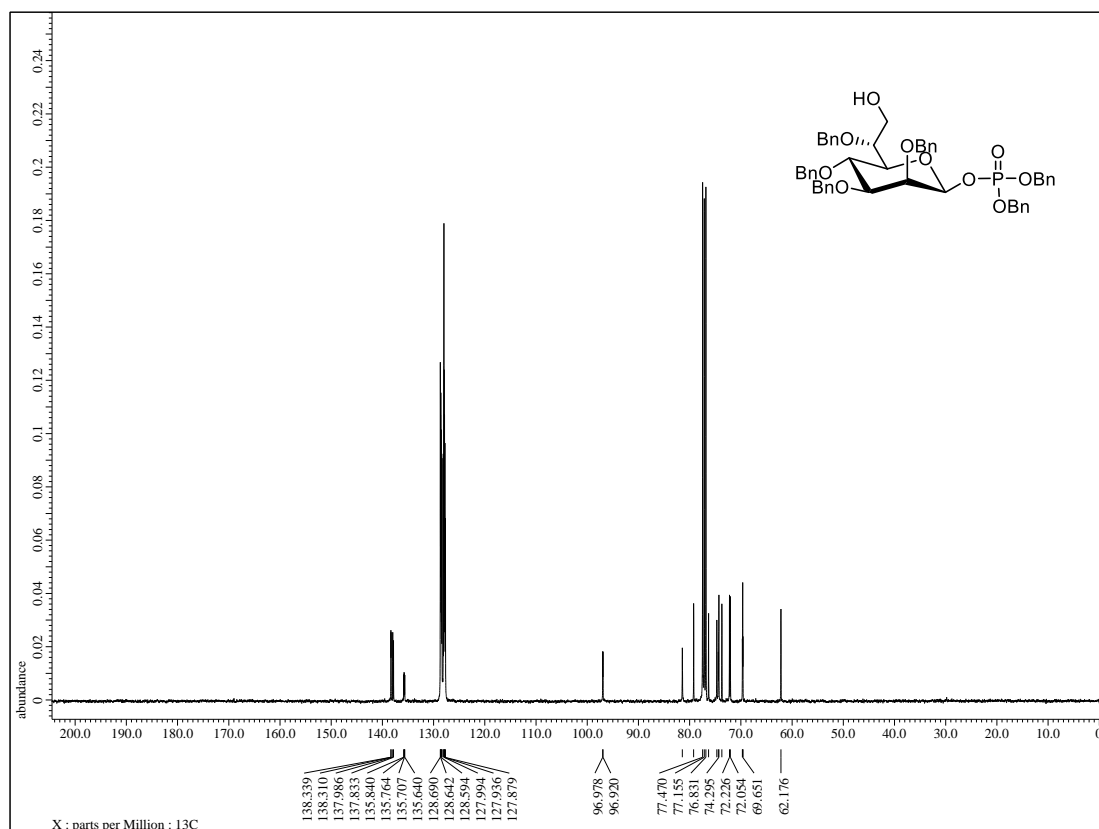

### <sup>19</sup>P NMR (162 MHz, CDCl<sub>3</sub>)

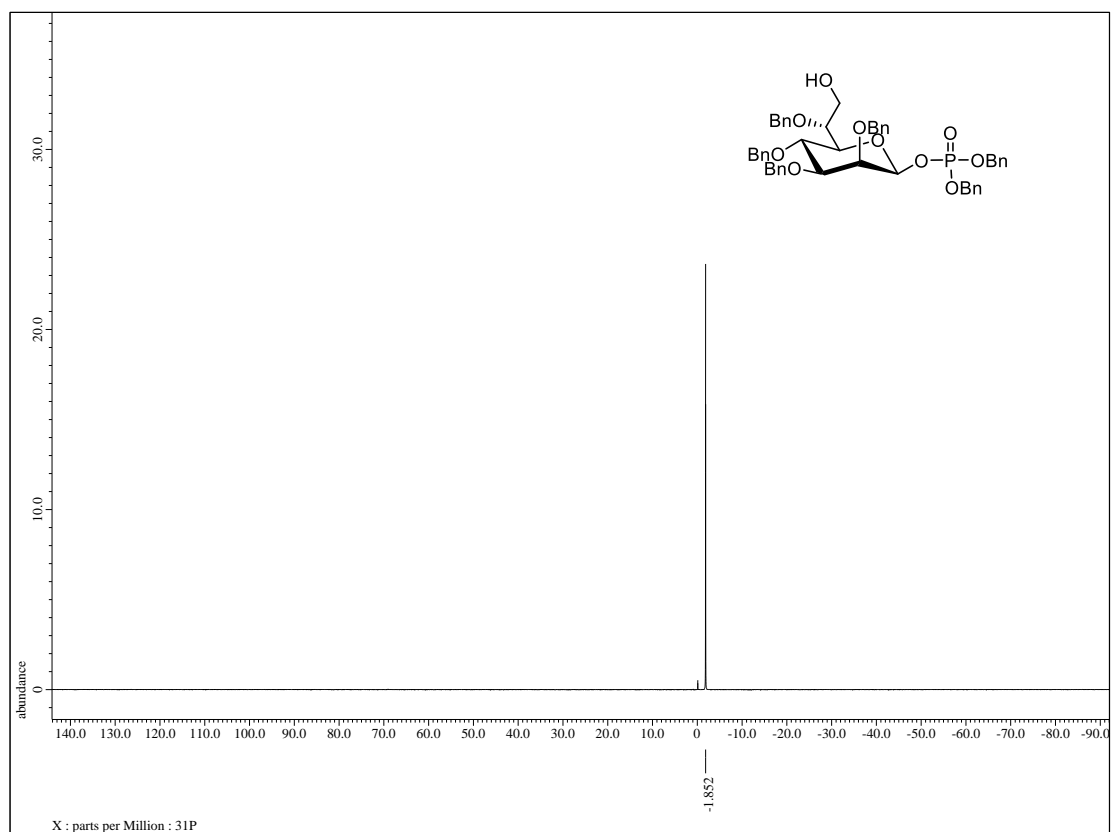

### <sup>1</sup>H NMR (400 MHz, CDCl<sub>3</sub>)

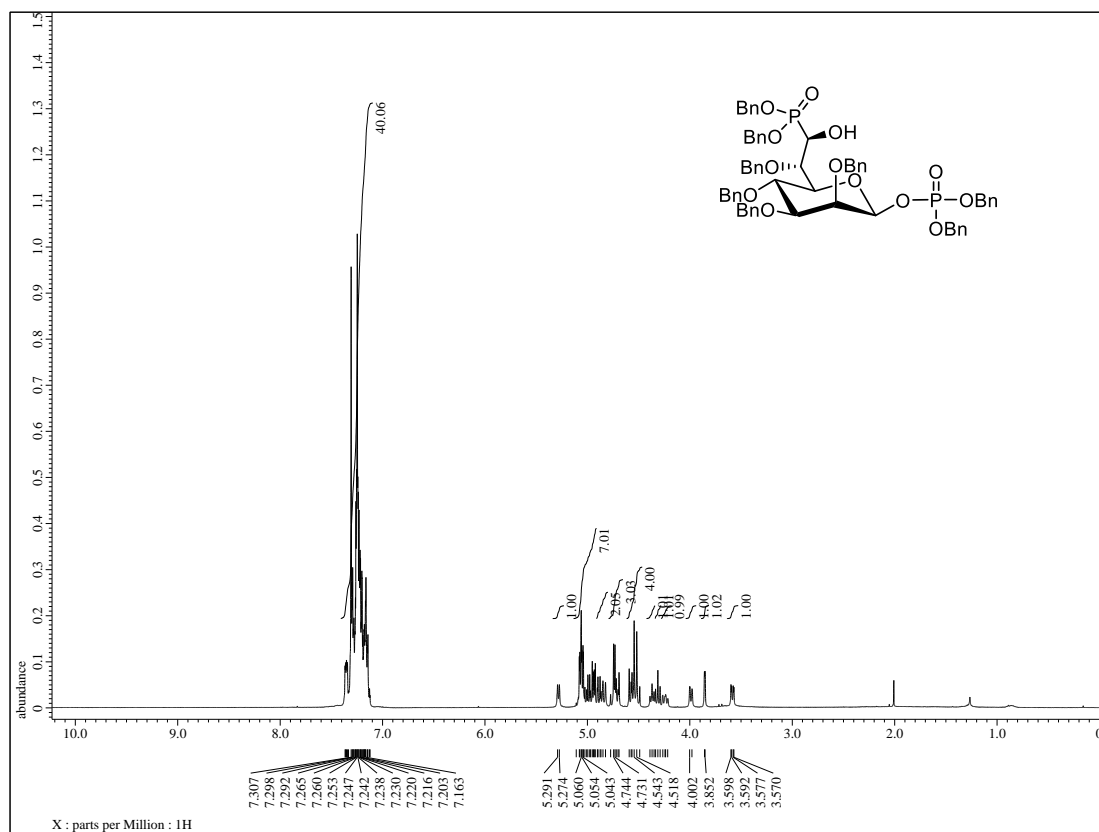

### <sup>13</sup>C NMR (125 MHz, CDCl<sub>3</sub>)

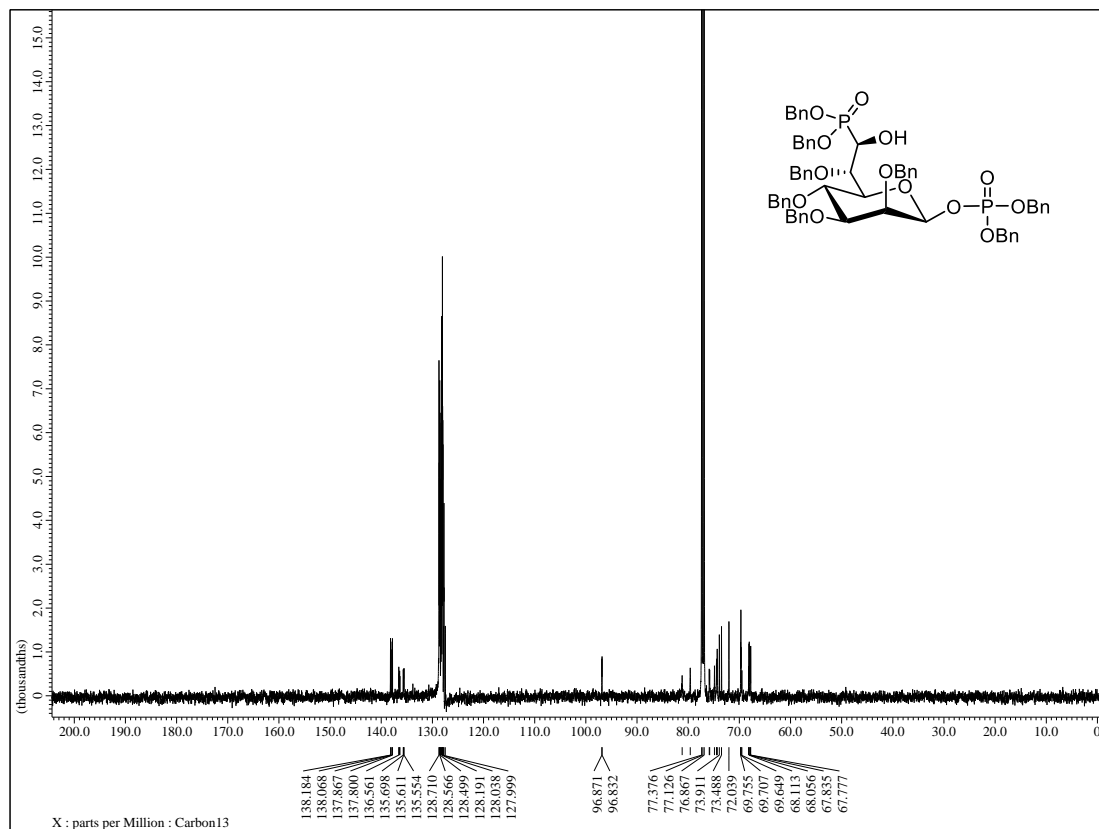

### <sup>31</sup>P NMR (162 MHz, CDCl<sub>3</sub>)

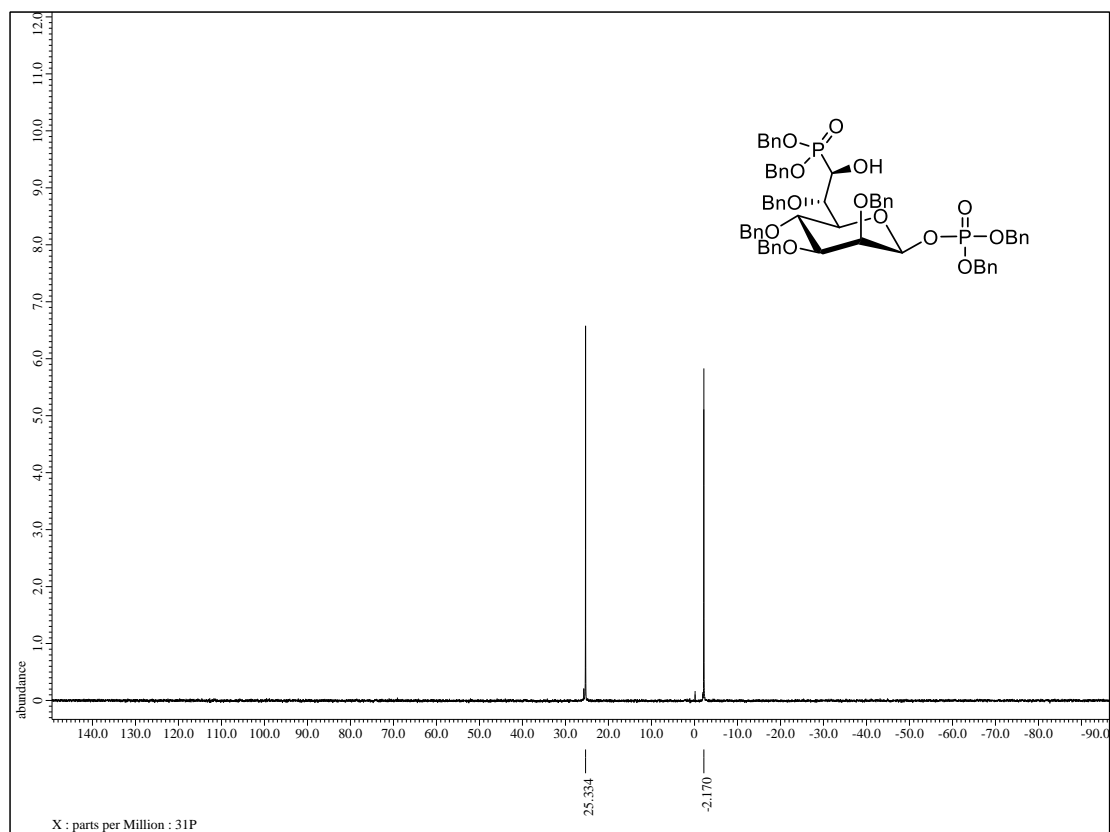

### <sup>1</sup>H NMR (400 MHz, CDCl<sub>3</sub>)

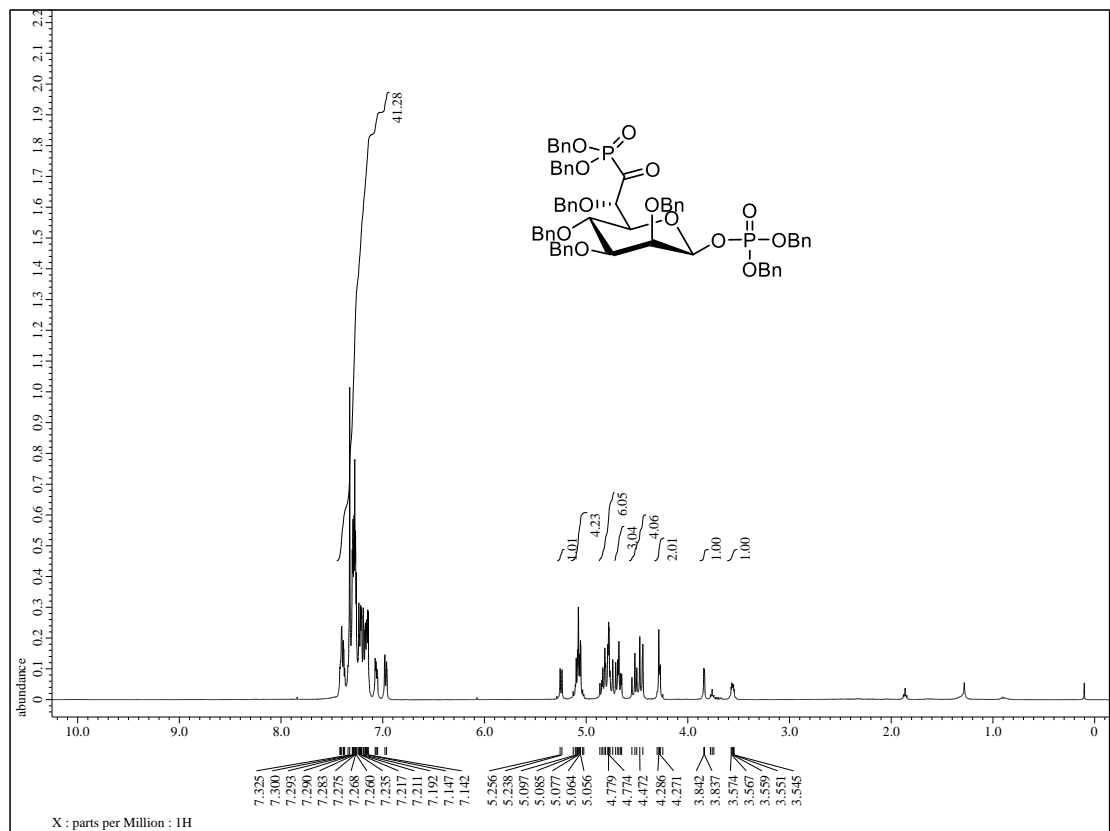

**<sup>13</sup>C NMR (100 MHz, CDCl<sub>3</sub>)**

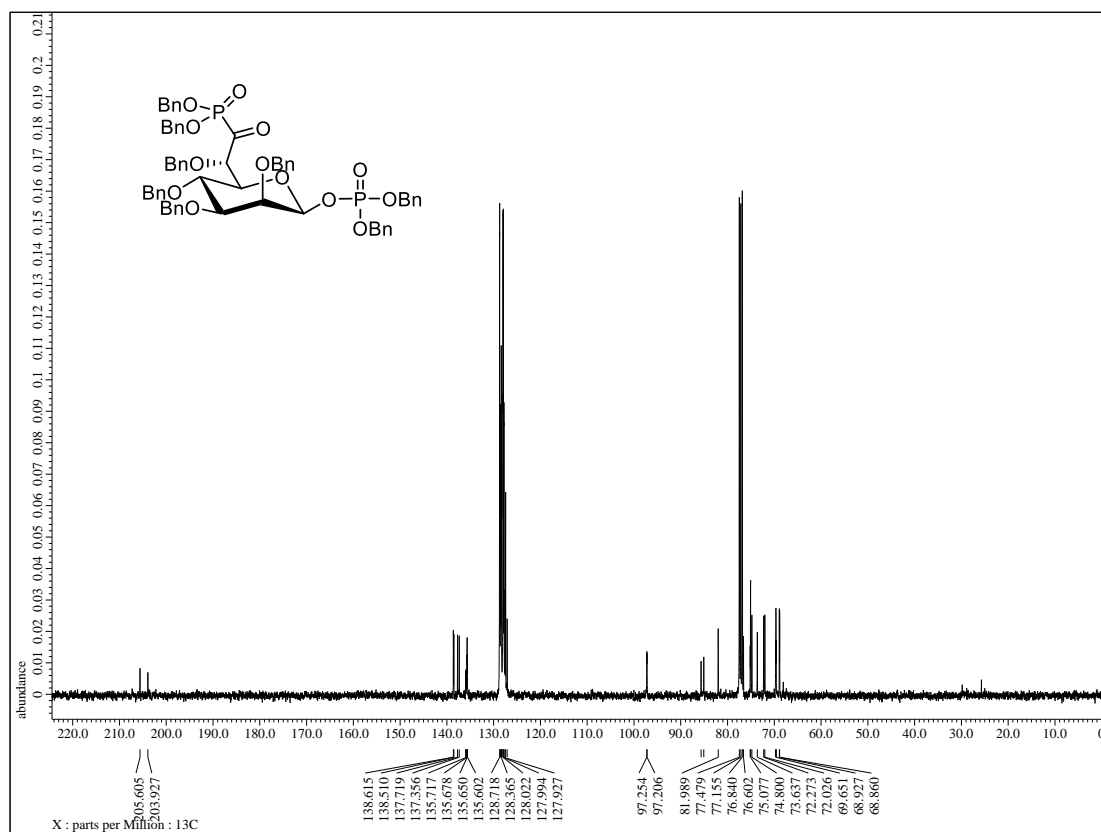

**<sup>31</sup>P NMR (162 MHz, CDCl<sub>3</sub>)**

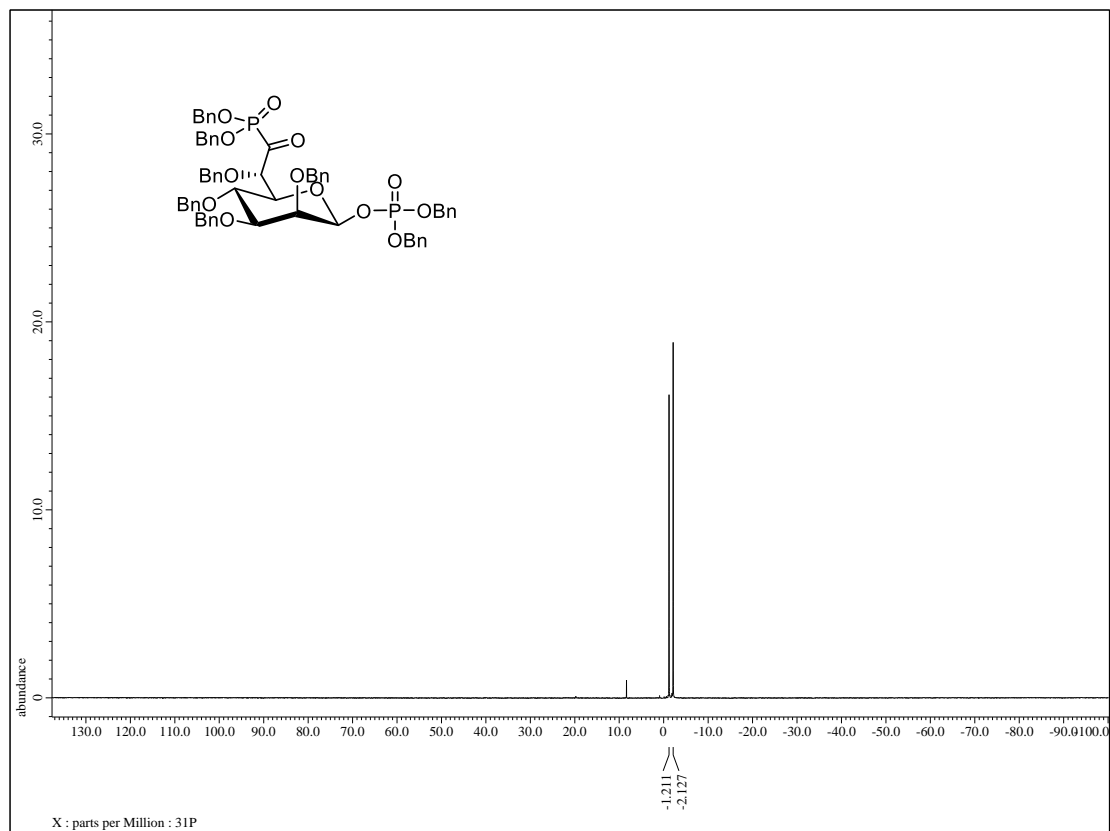



**<sup>1</sup>H NMR (500 MHz, CDCl<sub>3</sub>)**

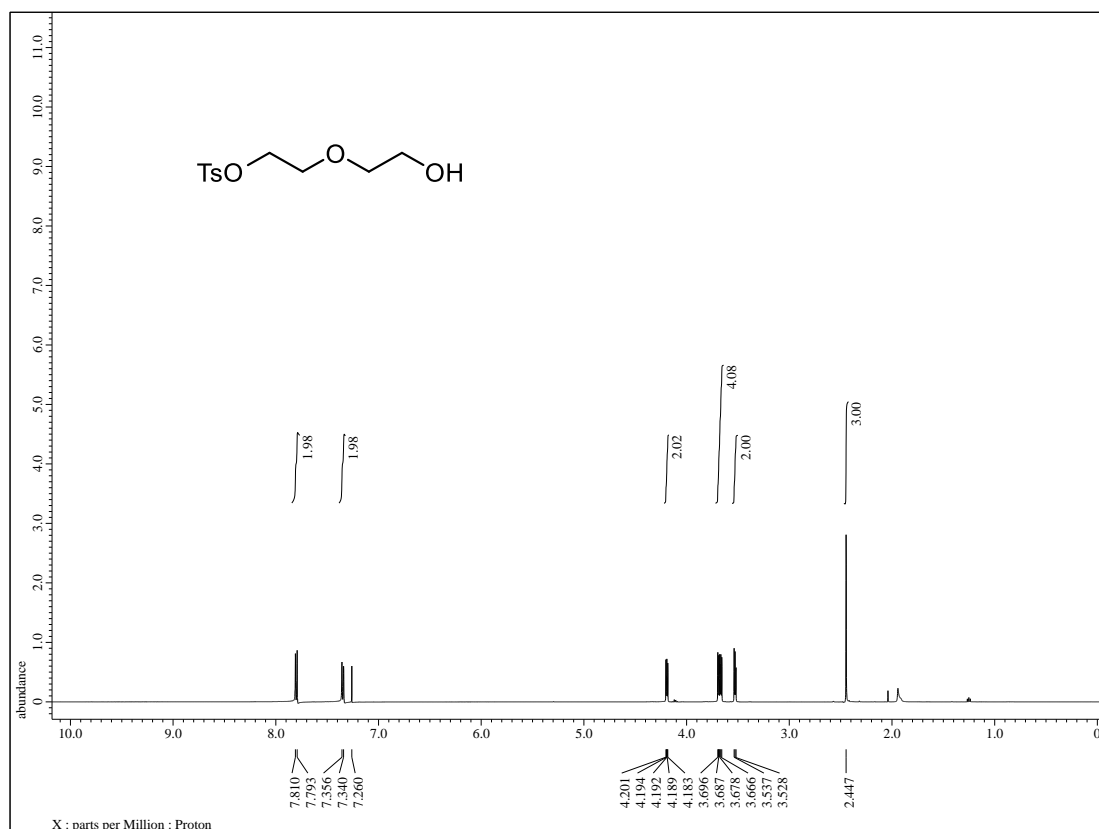

**<sup>13</sup>C NMR (125 MHz, CDCl<sub>3</sub>)**

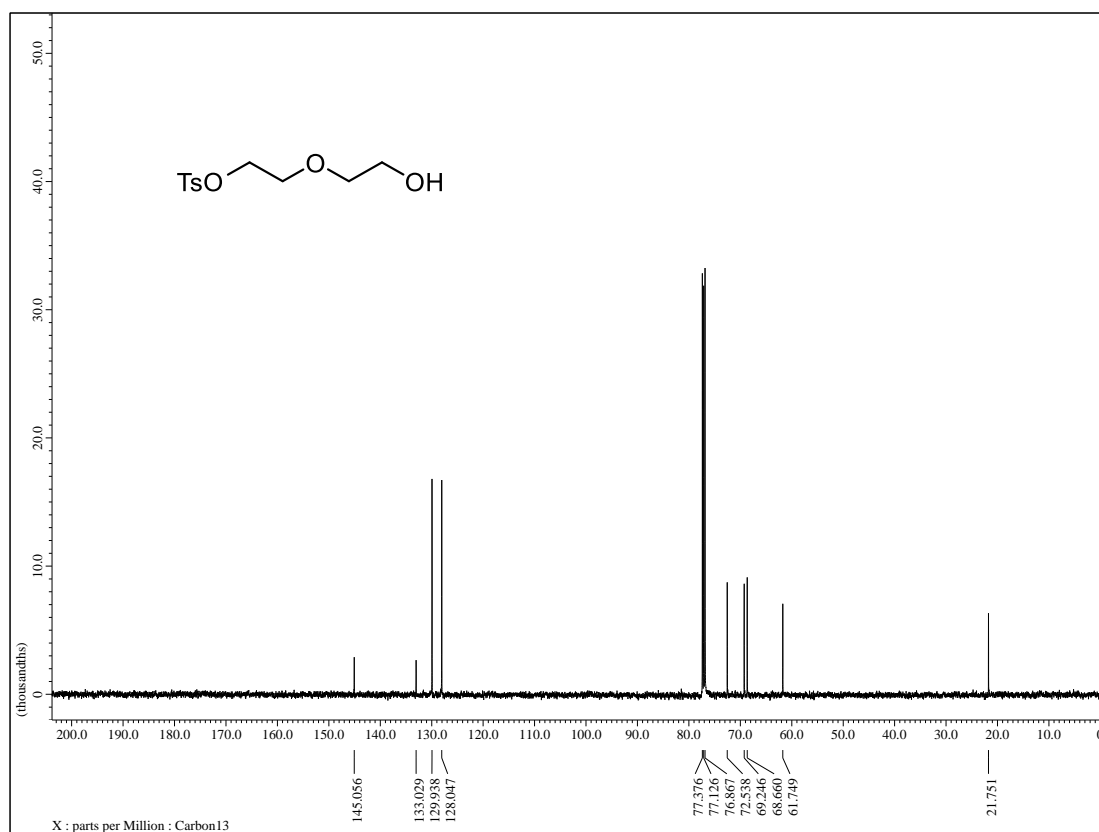

### <sup>1</sup>H NMR (400 MHz, CDCl<sub>3</sub>)

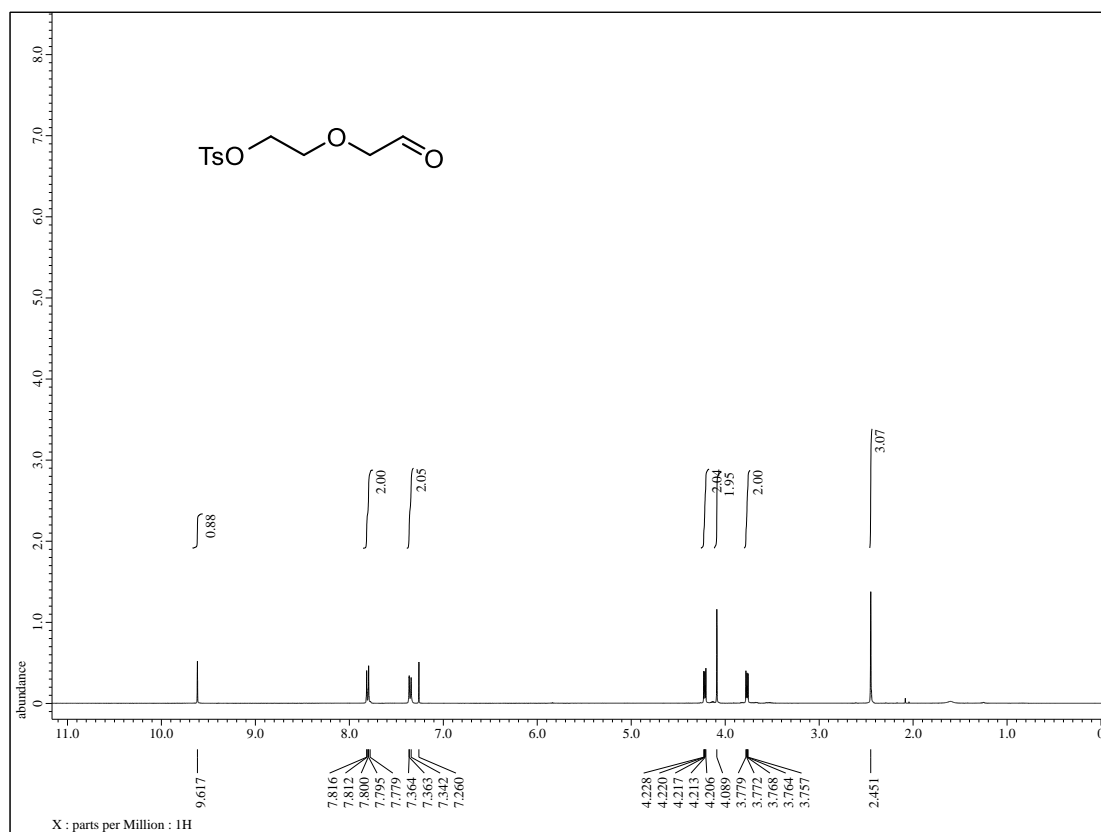

### <sup>13</sup>C NMR (100 MHz, CDCl<sub>3</sub>)

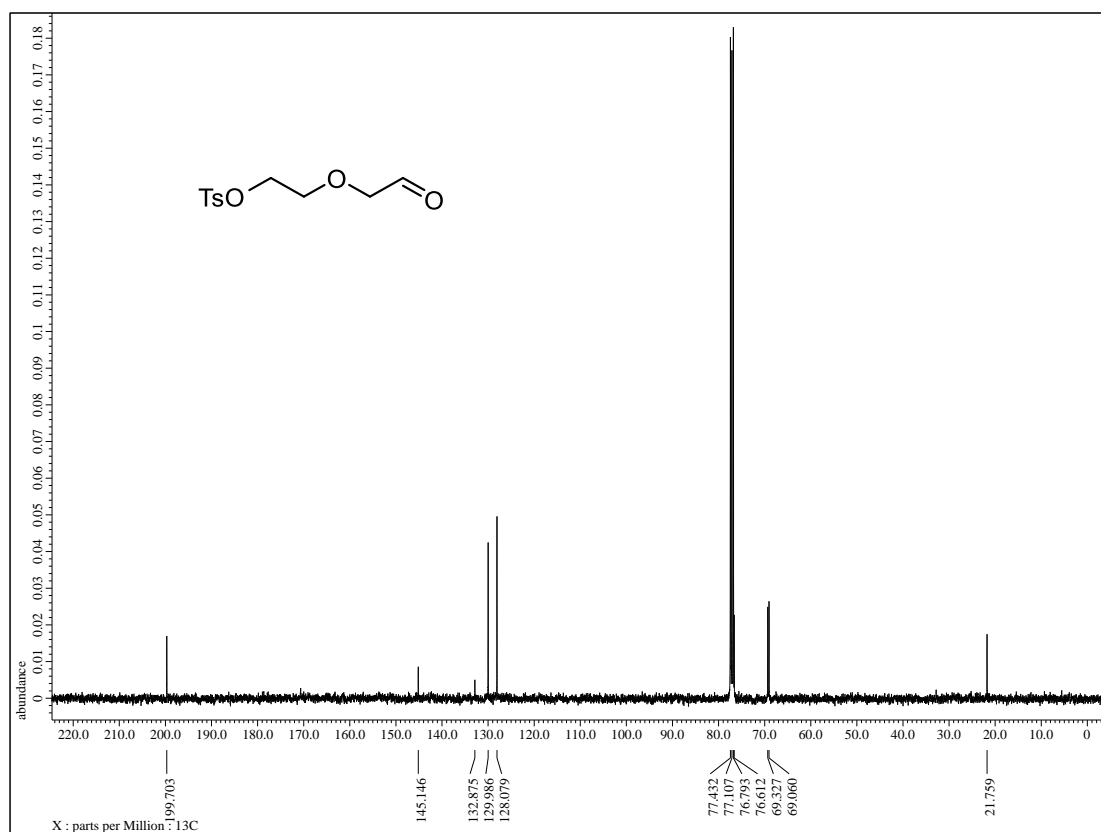

### <sup>1</sup>H NMR (400 MHz, CDCl<sub>3</sub>)

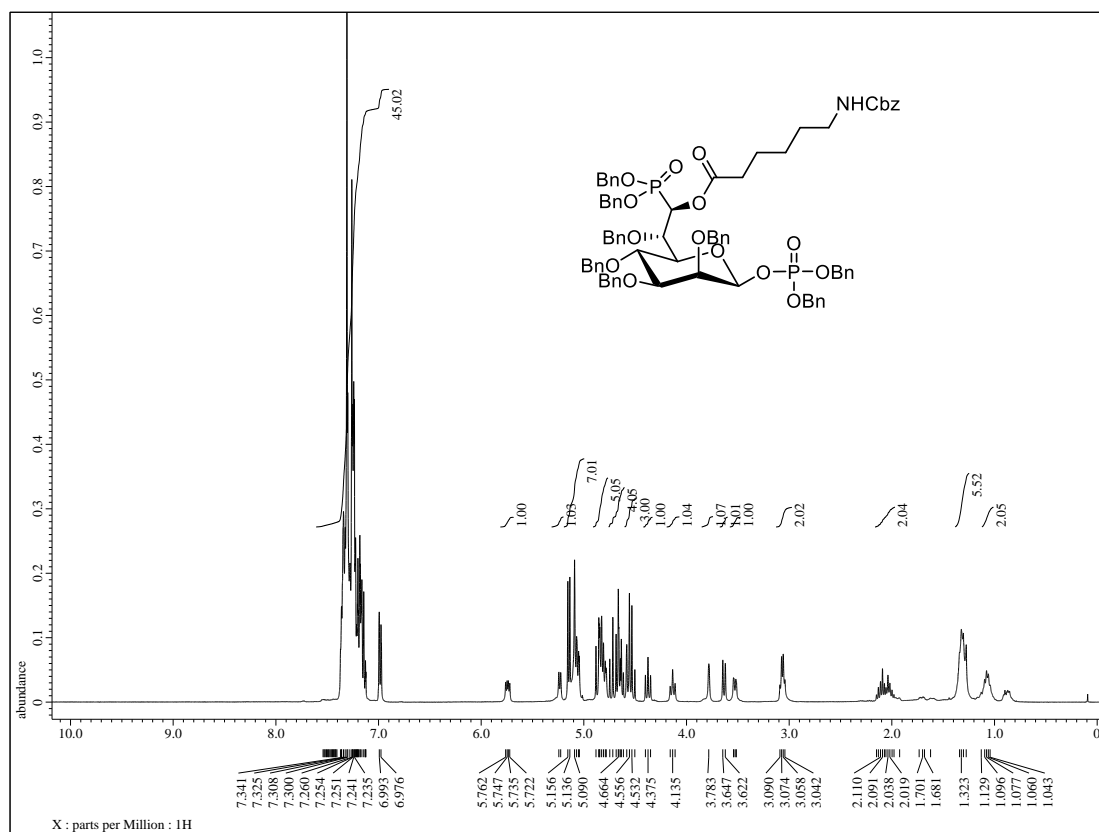

### <sup>13</sup>C NMR (100 MHz, CDCl<sub>3</sub>)

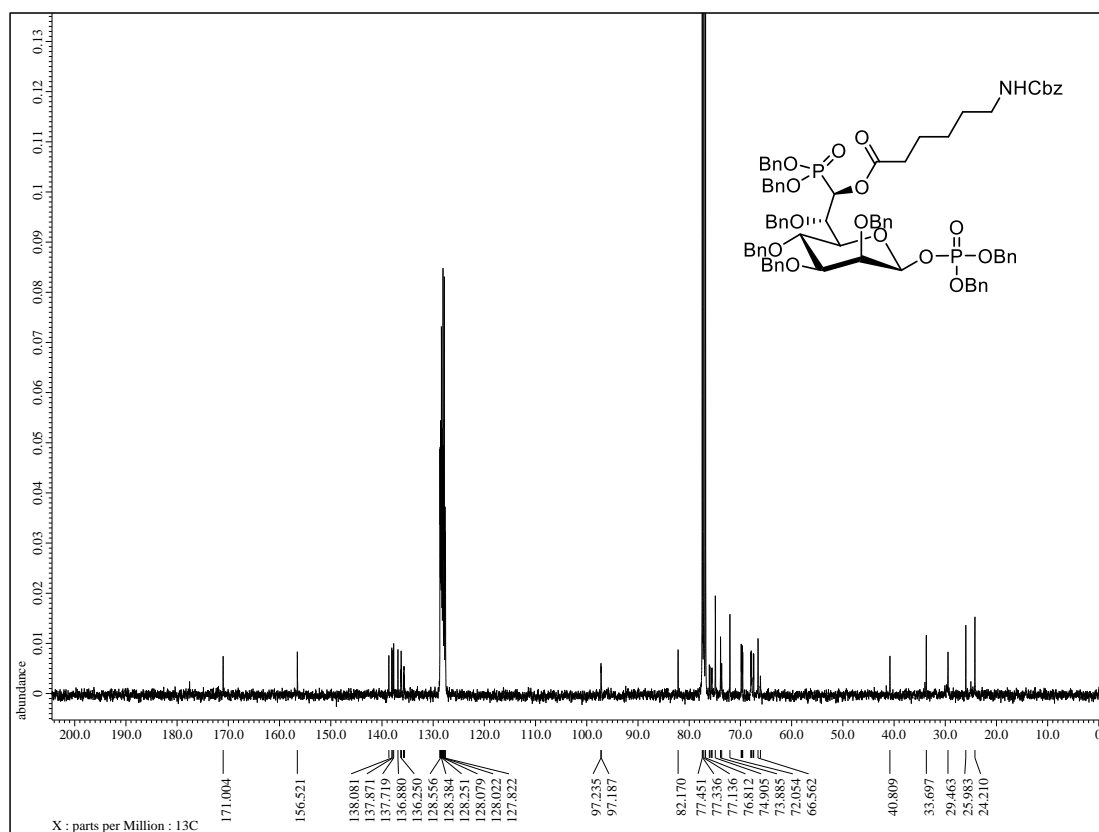

### $^{31}\text{P}$ NMR (162 MHz, $\text{CDCl}_3$ )

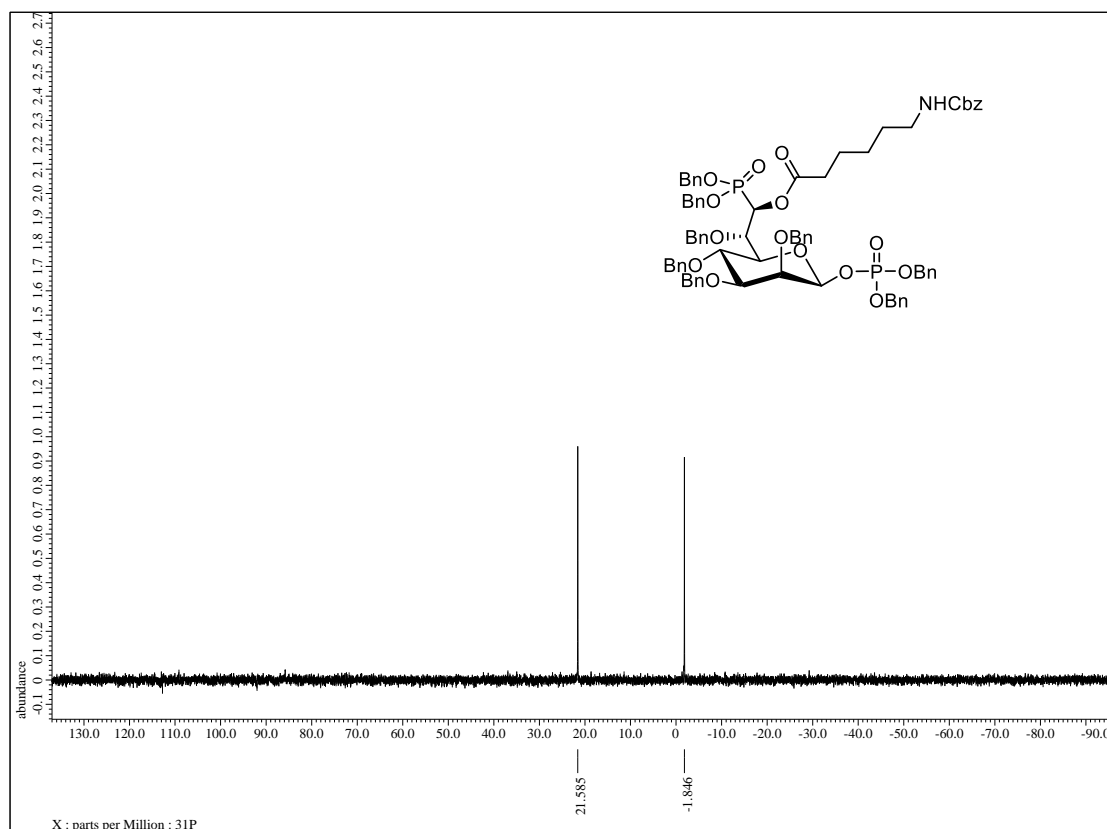

### $^1\text{H}$ NMR (400 MHz, $\text{D}_2\text{O}$ )

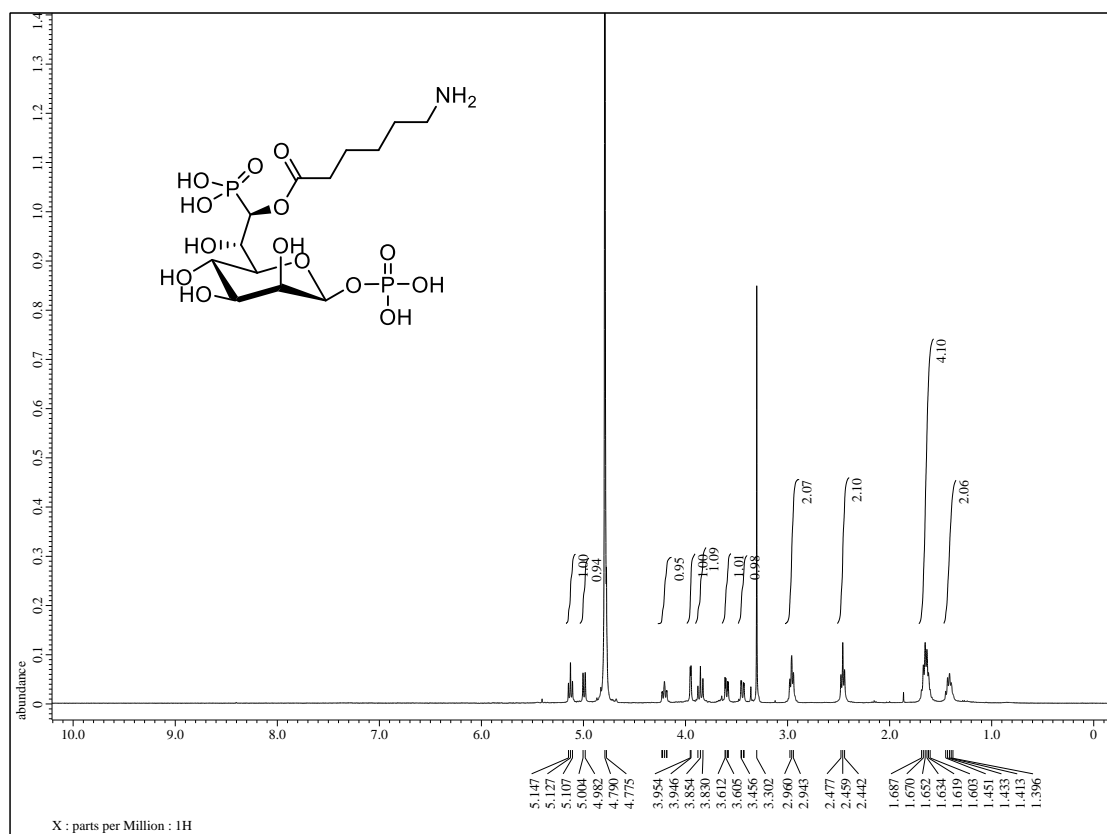

### <sup>13</sup>C NMR (125 MHz, D<sub>2</sub>O)

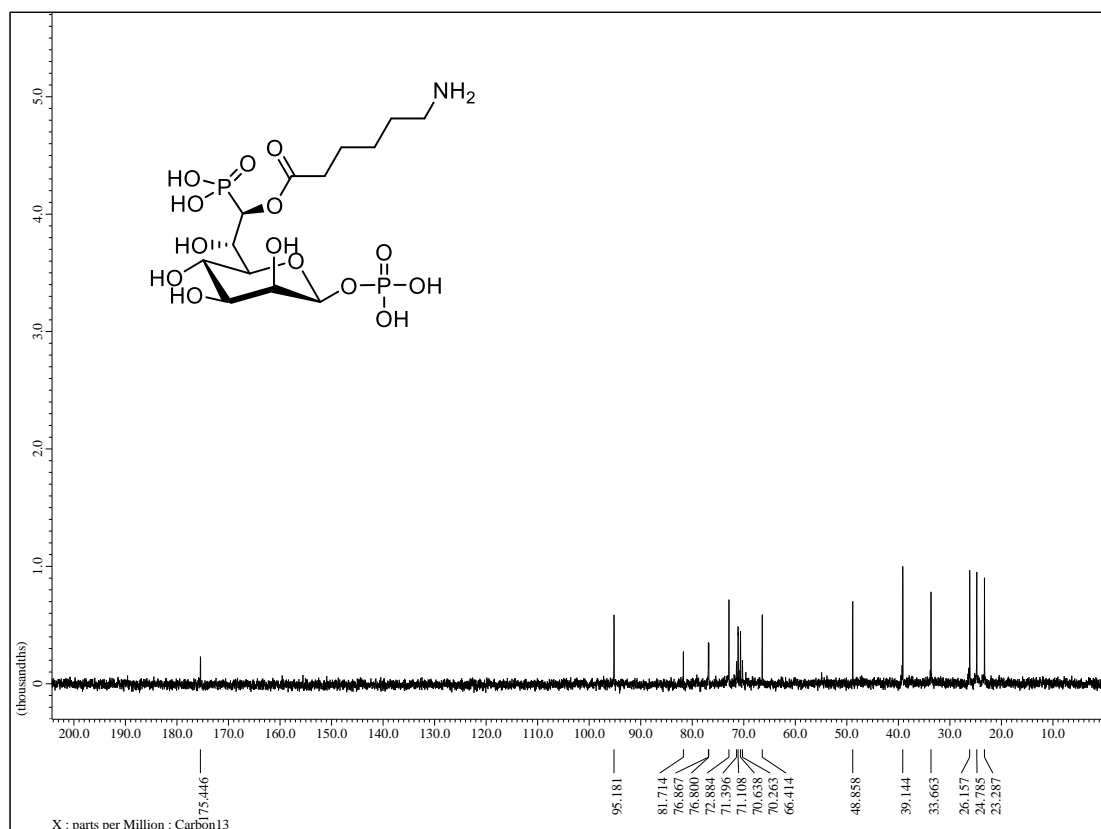

### <sup>31</sup>P NMR (162 MHz, D<sub>2</sub>O)

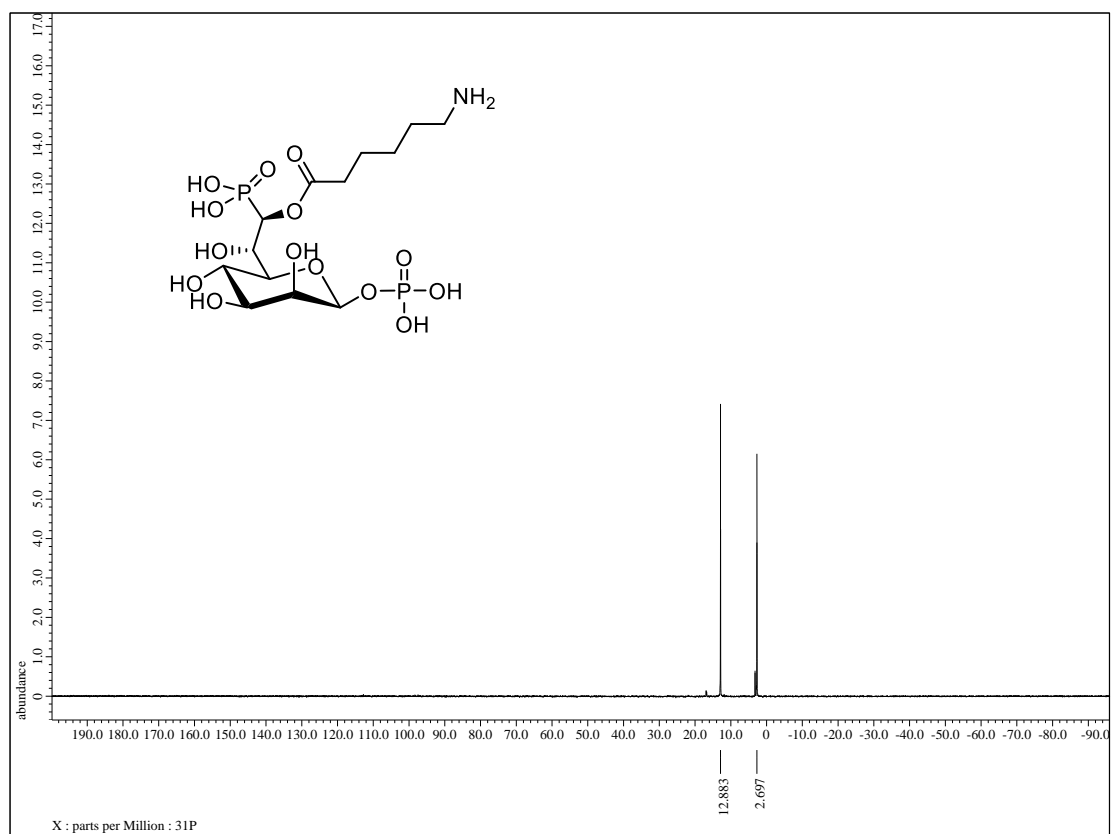

# <sup>1</sup>H NMR (400 MHz, D<sub>2</sub>O)

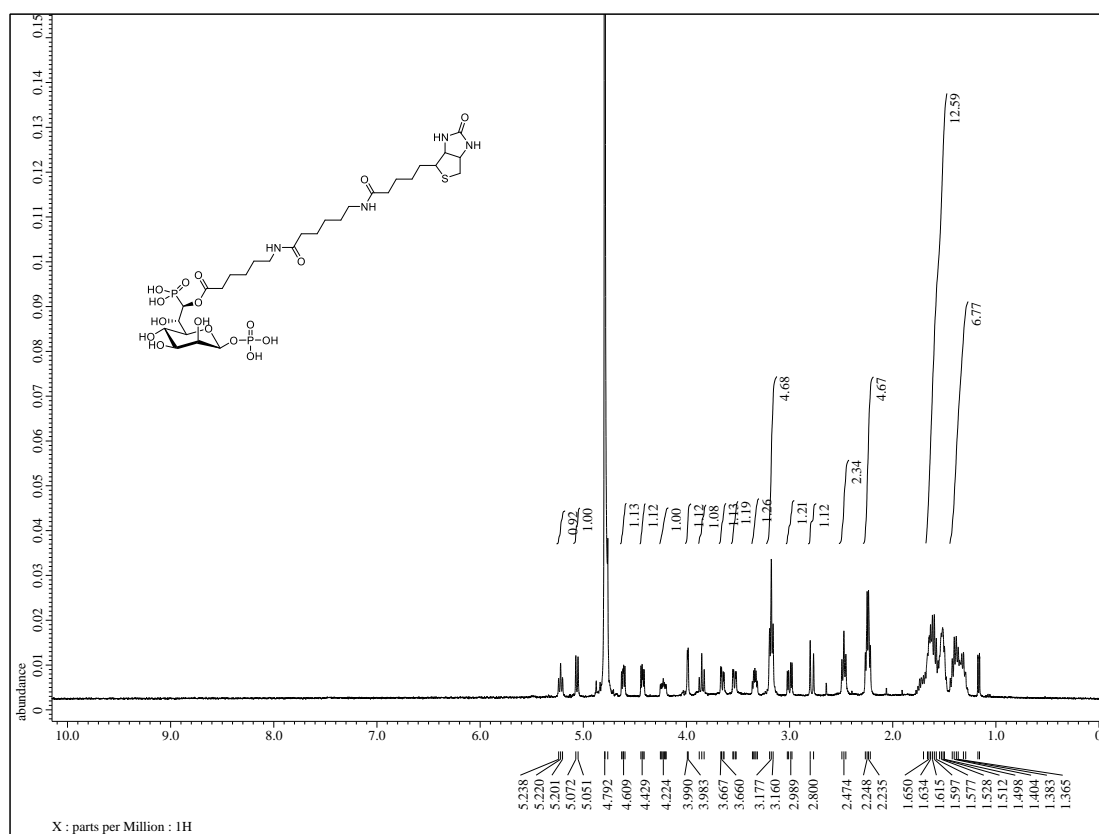

# <sup>13</sup>C NMR (125 MHz, D<sub>2</sub>O)

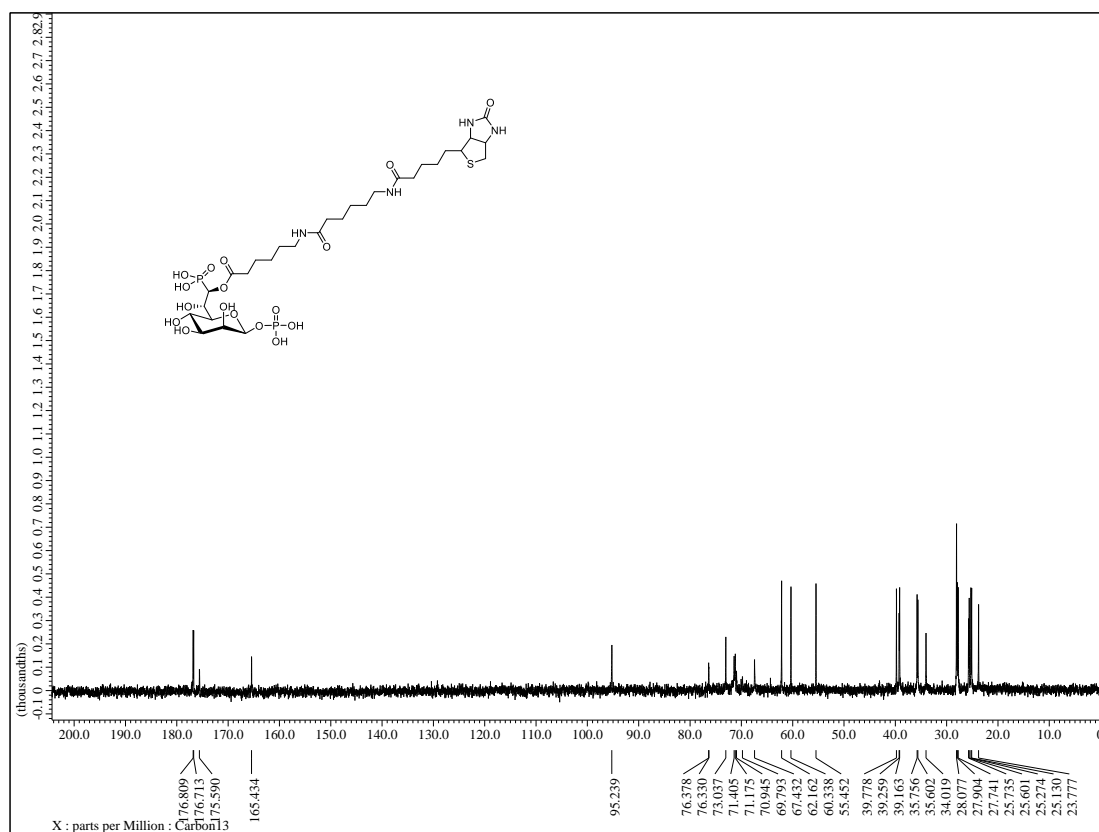

**<sup>31</sup>P NMR (162 MHz, D<sub>2</sub>O)**

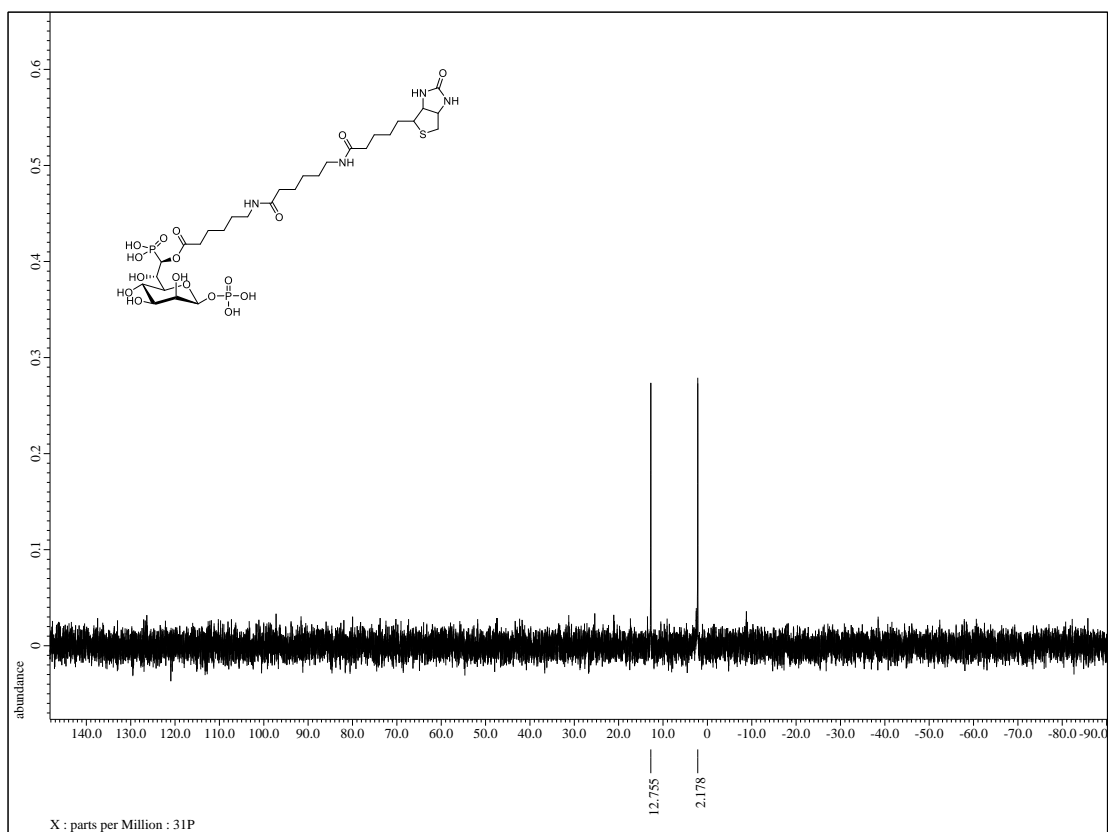

Supplement: d1ob00790d1.pdf [file d1ob00790d1.pdf]
